# Supplementary material for: Highly efficient and continuous triboelectric power harvesting based on a porous β-phase poly(vinylidene fluoride) aerogel
Source: Royal Society of Chemistry journal article supplement (doi:10.1039/d0nj05134a), 2020-12-24
Supplement: d0nj05134a1.pdf [file d0nj05134a1.pdf]

# High Efficient and Continuous Triboelectric Power Harvesting based on Porous $\beta$ -phase Poly (vinylidene fluoride) Aerogel

Minmin Wang,<sup>[a]#</sup> Weiqun Liu,<sup>[a]#</sup> Xu Shi,<sup>[a]#</sup> Jinyang Pan<sup>[a]</sup>, Bing Zhou,<sup>[a]</sup> Jin Wang,<sup>\*[a,b]</sup> Tongming Sun,<sup>\*[a]</sup> Yanfeng Tang<sup>\*[a,b]</sup>

---

[a] M. Wang, W. Liu, X. Shi, J. Pan, B. Zhou, Dr. J. Wang, Dr. T. Sun, Dr. Y. Tang  
School of Chemistry and Chemical Engineering, Nantong University, Nantong 226019, China  
E-mail: [wangjin110@ntu.edu.cn](mailto:wangjin110@ntu.edu.cn); [stm7314@ntu.edu.cn](mailto:stm7314@ntu.edu.cn); [tangyf@ntu.edu.cn](mailto:tangyf@ntu.edu.cn)

[b] Dr. J. Wang, Dr. Y. Tang  
Nantong Key Laboratory of Intelligent and New Energy Materials

# These authors contributed equally to this work.

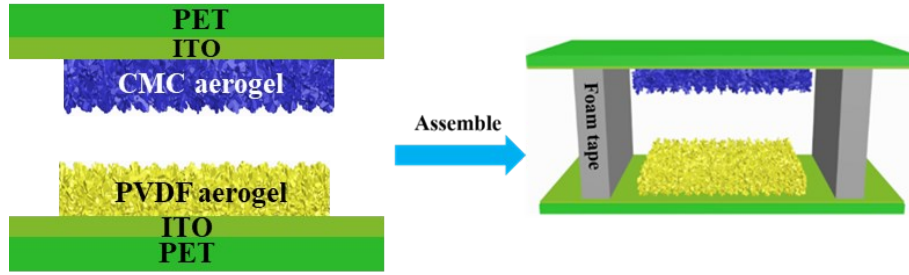

**Figure S1.** Schematic of TENG based on  $\beta$ -phase PVDF aerogel.

**Calculation of aerogel porosity:** <sup>1-3</sup>

The densities of the solid materials ( $\rho_s$ ) were calculated according to Equation S1 based on the solid density of each component and their weight ratios used in the formulation,

$$\rho_s = \frac{1}{\frac{w_{P(BA-BMA)}}{\rho_{P(BA-BMA)}} + \frac{w_{CMC}}{\rho_{CMC}}} \quad (S1)$$

where  $W$  was the weight percentage of the different components, and  $\rho_{P(BA-BMA)}$  and  $\rho_{CMC}$  were the solid densities of P(BA-BMA) and CMC, respectively.

The solid densities for P(BA-BMA) and CMC used here were 1080 and 600 kg m<sup>-3</sup>, respectively, according to the manufacturer's data sheet. The porosities of the porous aerogel samples were calculated according to Equation S2,

$$\text{Porosity} = \left(1 - \frac{\rho_a}{\rho_s}\right) \times 100\% \quad (S2)$$

where  $\rho_a$  was the measured density of each porous aerogel sample, and  $\rho_s$  was the density of its corresponding solid sample.

**Table S1** Parameters  $\rho_a$ ,  $\rho_s$ , and porosities of the samples.

| Samples                      | $\rho_a$ (kg m <sup>-3</sup> ) | $\rho_s$ (kg m <sup>-3</sup> ) | Porosity (%) |
|------------------------------|--------------------------------|--------------------------------|--------------|
| CMC aerogel                  | 10                             | 600                            | 98.3%        |
| Compressed CMC aerogel film  | 208.2                          | 600                            | 65.3%        |
| PVDF aerogel                 | 41.1                           | 1800                           | 97.7%        |
| Compressed PVDF aerogel film | 537.8                          | 1800                           | 70.1%        |

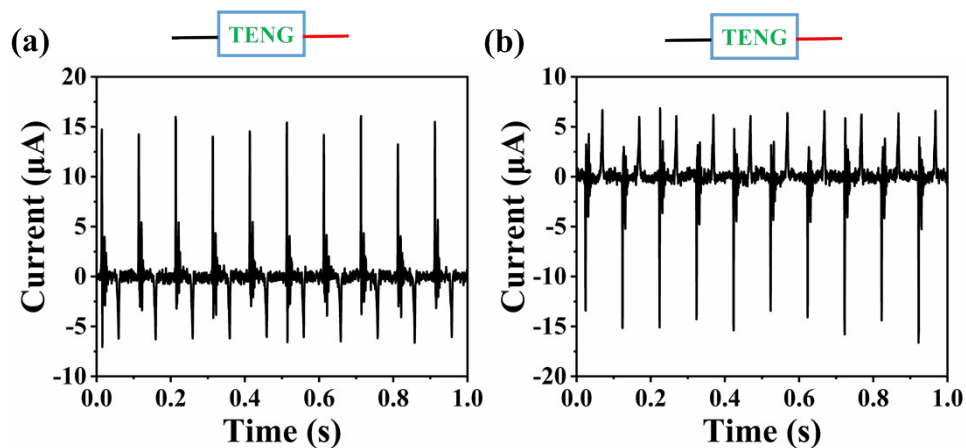

**Figure S2.** The  $I_{sc}$  of TENG connected in reverse under a compressive stress of 0.08 MPa at a frequency of 10 Hz.

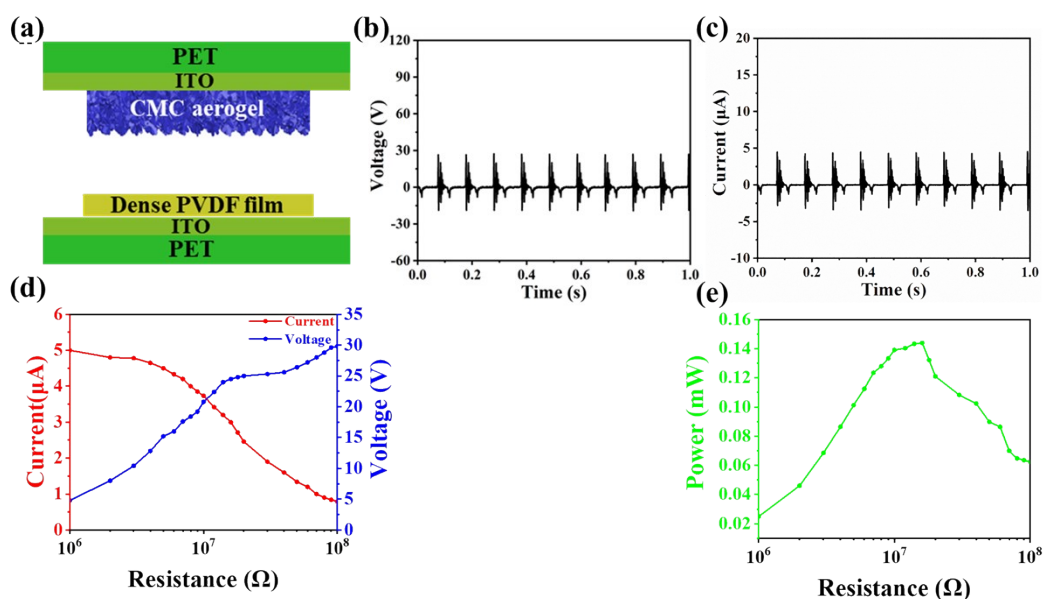

**Figure S3.** (a) Schematic of TENG based on dense PVDF film. (b) The  $V_{oc}$  and (c)  $I_{oc}$  of TENG based on dense PVDF film under a compressive stress of 0.08 MPa at a frequency of 10 Hz. (d, e) Output performance for TENG based on dense PVDF film loaded with a resistance from  $10^6 \Omega$  to  $10^8 \Omega$ .

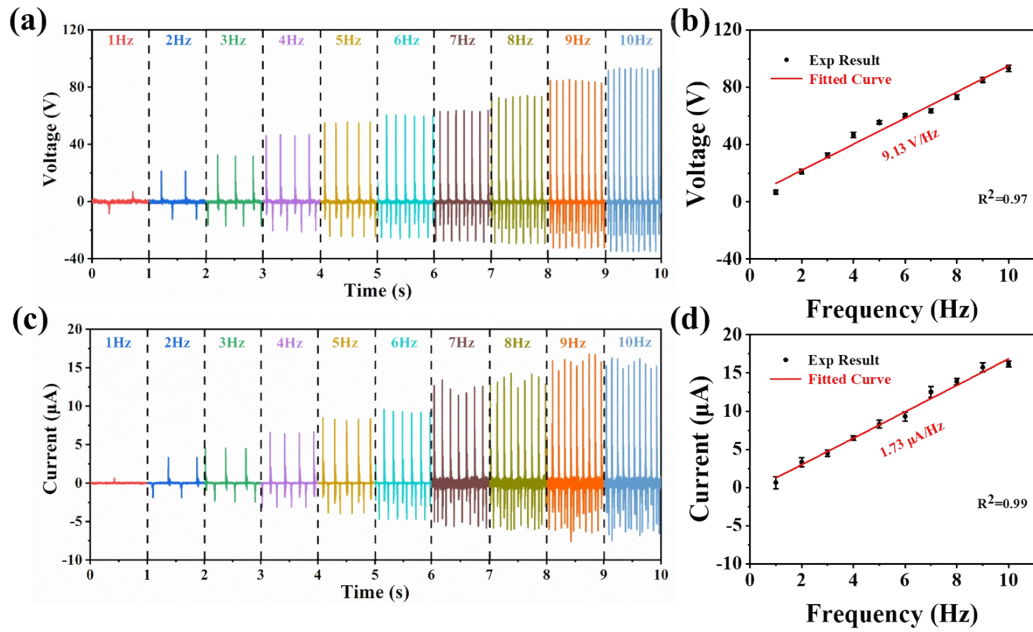

**Figure S4.** The  $V_{oc}$  and  $I_{sc}$  of TENG based on  $\beta$ -phase PVDF aerogel at different frequencies under a periodic pressure of 0.08 MPa.

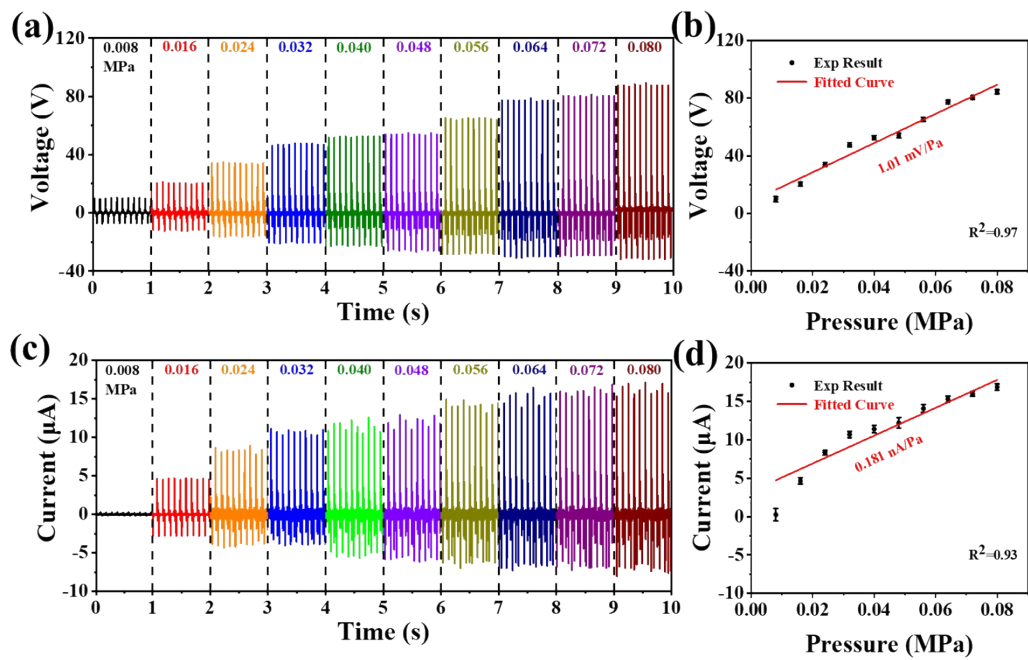

**Figure S5.** The  $V_{oc}$  and  $I_{sc}$  of TENG based on  $\beta$ -phase PVDF aerogel at different pressure under a frequency of 10 Hz.

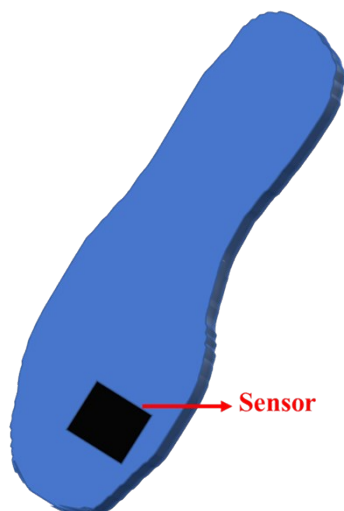

**Figure S6.** Schematic of the self-powered motion sensor.

## References

1. Y. Tang, Q. Zheng, B. Chen, Z. Ma and S. Gong, *Nano Energy*, 2017, 38, 401-411.
2. Q. Zheng, Z. Cai and S. Gong, *J. Mater. Chem. A*, 2014, 2, 3110-3118.
3. Q. Zheng, Z. Cai, Z. Ma and S. Gong, *ACS Appl. Mater. Interfaces*, 2015, 7, 3263-3271.
